# Supplementary material for: Theoretical investigation of the SN2 mechanism of X− [X = SH, PH2] + CH3Y [Y = F, Cl, Br, I] reactions in water
Source: Royal Society of Chemistry journal article supplement (doi:10.1039/d1cp03048e), 2021-01-01
Supplement: d1cp03048e1.pdf [file d1cp03048e1.pdf]

## SUPPORTING INFORMATION

**Theoretical investigation of the S<sub>N</sub>2 mechanism of X<sup>-</sup> [X = SH, PH<sub>2</sub>] +**

**CH<sub>3</sub>Y [Y = F, Cl, Br, I] reactions in water solution**

*Chen Li, Xin Xin and Danyou Wang\**

College of Physics and Electronics, Shandong Normal University, Jinan Shandong 250014, China.

\*Corresponding Author. Electronic mail: [dywang@sdu.edu.cn](mailto:dywang@sdu.edu.cn)

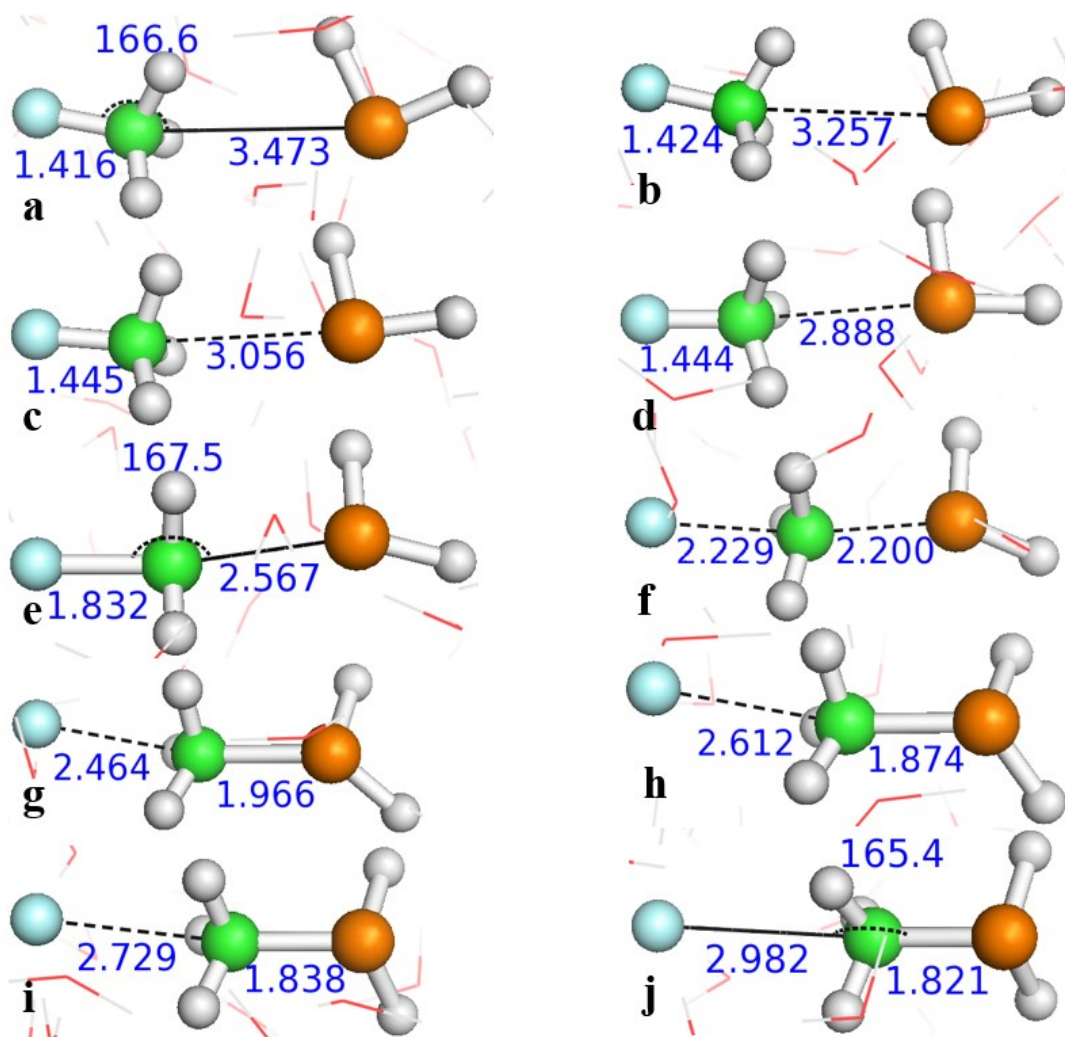

**Fig. S1** Structural evolution along the NEB reaction path for the  $\text{PH}_2^- + \text{CH}_3\text{F}$  reaction in water solution. No. a is the reactant complex, No. e is the transition state, and No. j is the product complex. The units of the distances and angles are angstroms and degrees, respectively.

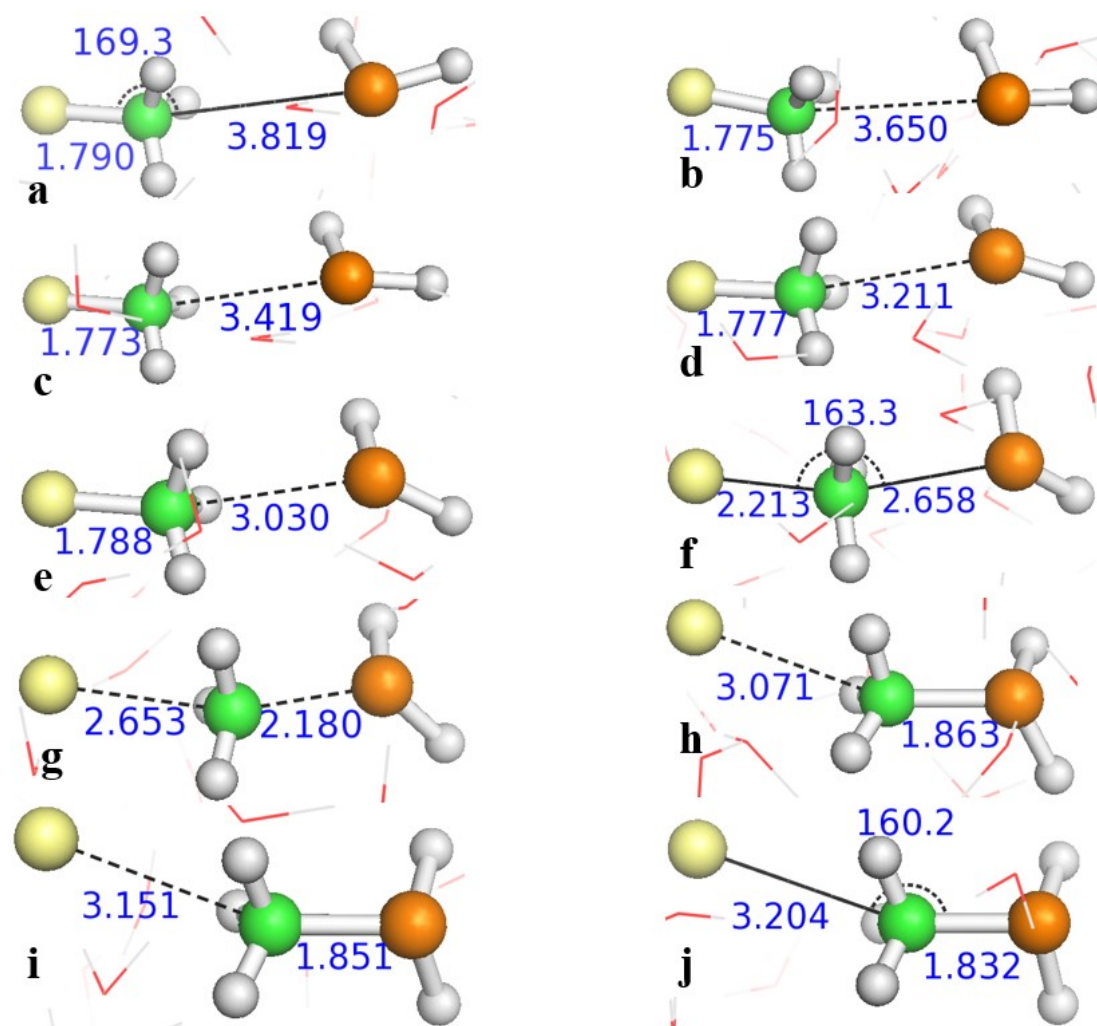

**Fig. S2** Structural evolution along the NEB reaction path for the  $\text{PH}_2^- + \text{CH}_3\text{Cl}$  reaction in water solution. No. a is the reactant complex, No. f is the transition state, and No. j is the product complex. The units of the distances and angles are angstroms and degrees, respectively.

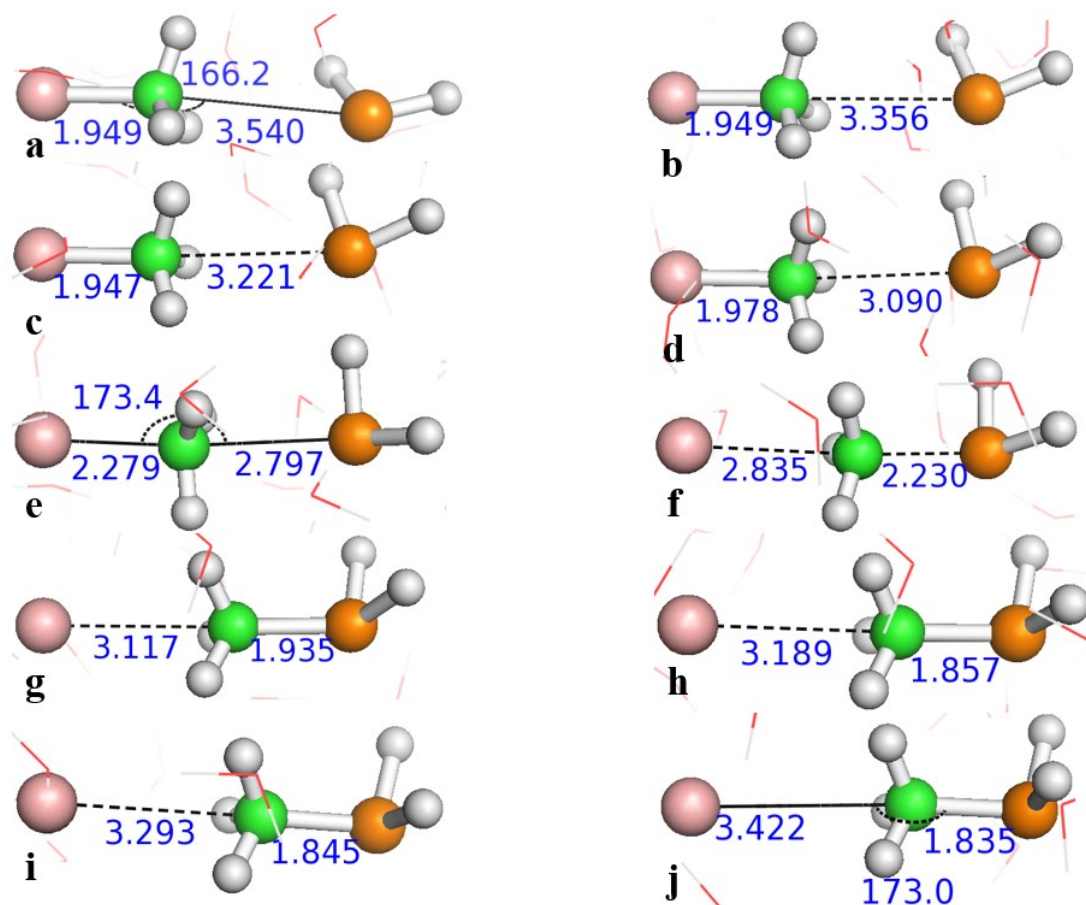

**Fig. S3** Structural evolution along the NEB reaction path for the  $\text{PH}_2^- + \text{CH}_3\text{Br}$  in water solution. No. a is the reactant complex, No. e is the transition state, and No. j is the product complex. The units of the distances and angles are angstroms and degrees, respectively.

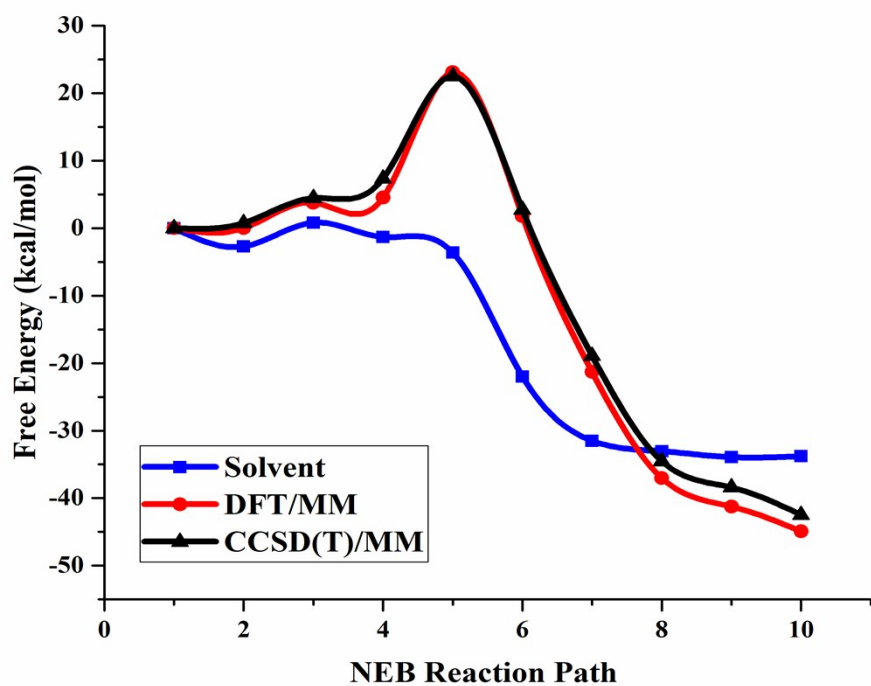

**Fig. S4** The potentials of mean force calculated at DFT/MM and CCSD(T)/MM levels of theory and solvent energy contribution with the reactant complex as the energy reference point for the  $\text{PH}_2^- + \text{CH}_3\text{F}$  reaction in water solution.

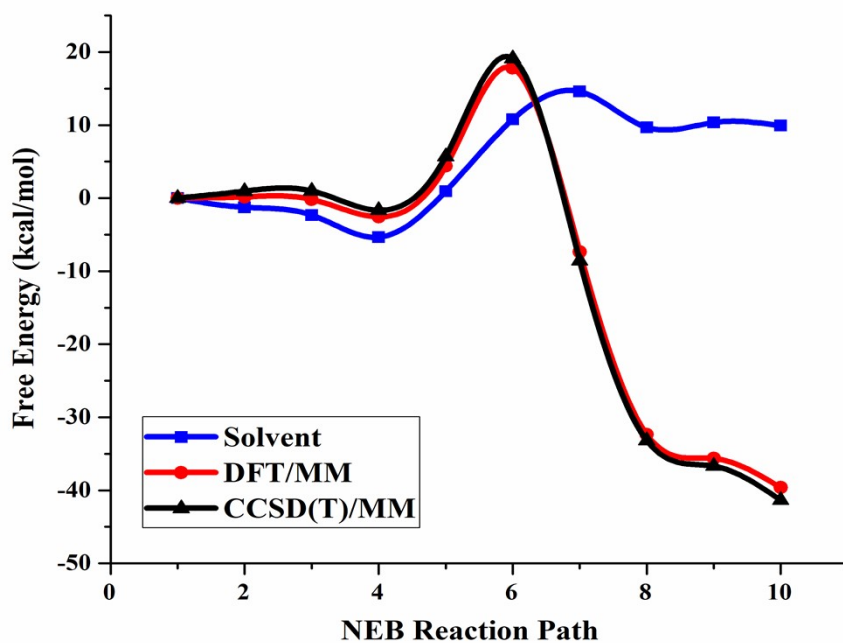

**Fig. S5** The potentials of mean force calculated at DFT/MM and CCSD(T)/MM levels of theory and solvent energy contribution with the reactant complex as the energy reference point for the  $\text{PH}_2^- + \text{CH}_3\text{Cl}$  reaction in water solution.

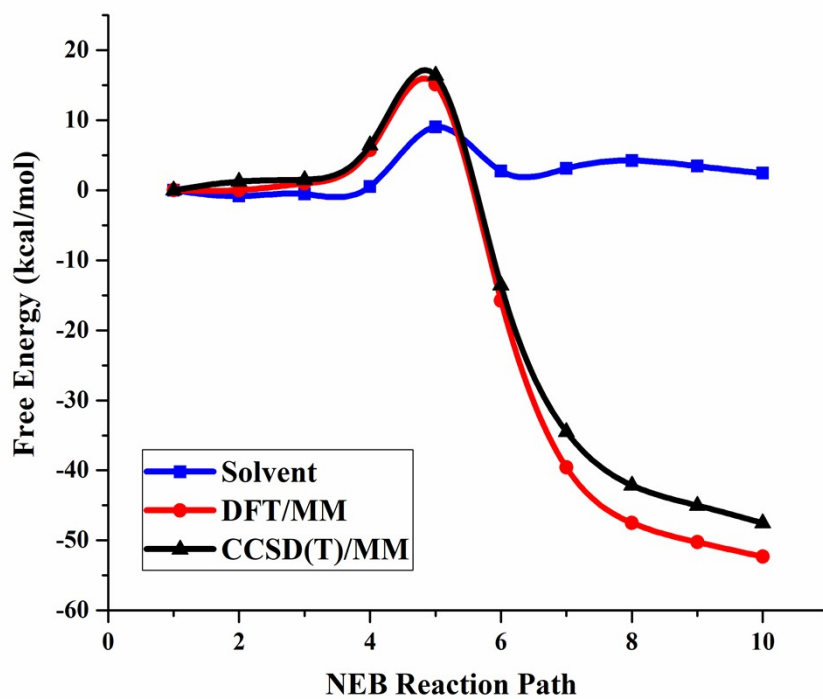

**Fig. S6** The potentials of mean force calculated at DFT/MM and CCSD(T)/MM levels of theory and solvent energy contribution with the reactant complex as the energy reference point for the  $\text{PH}_2^- + \text{CH}_3\text{Br}$  reaction in water solution.

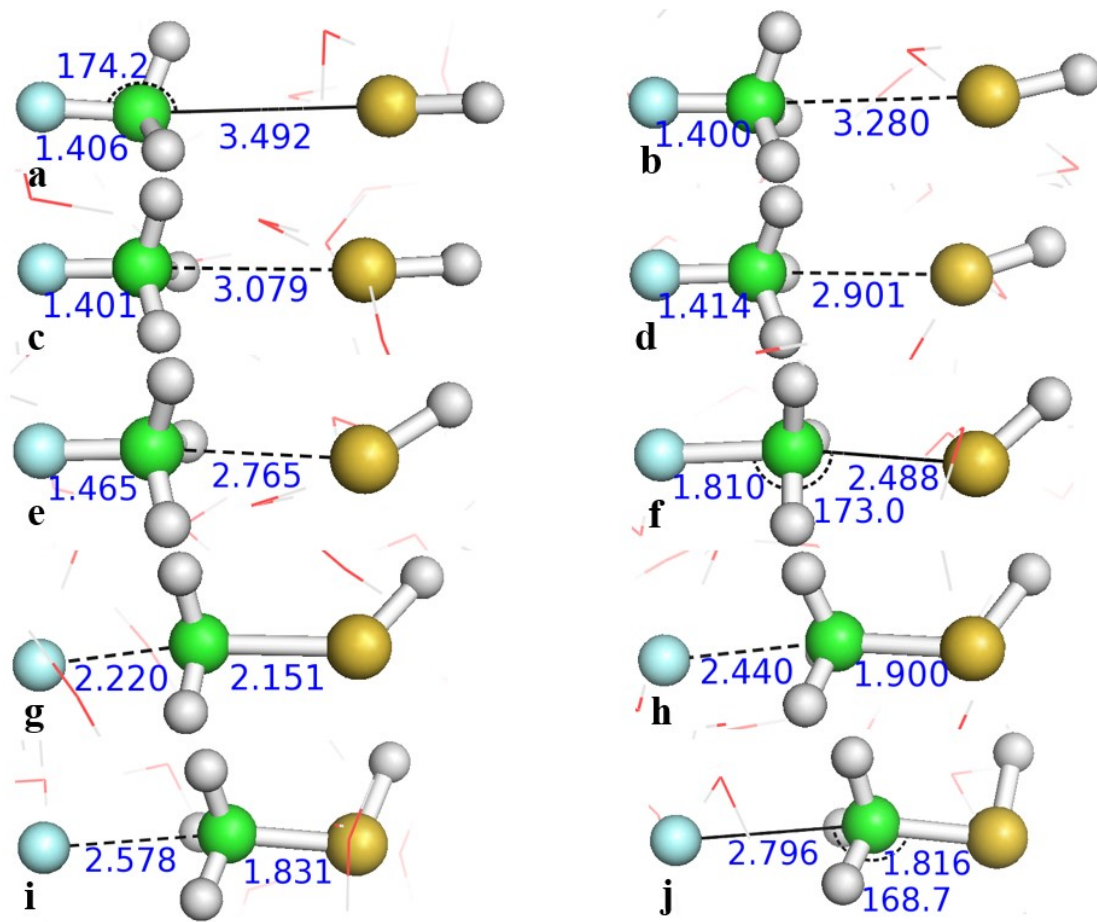

**Fig. S7** Structural evolution along the NEB reaction path for the  $\text{SH}^- + \text{CH}_3\text{F}$  reaction in water solution. No. a is the reactant complex, No. f is the transition state, and No. j is the product complex. The units of the distances and angles are angstroms and degrees, respectively.



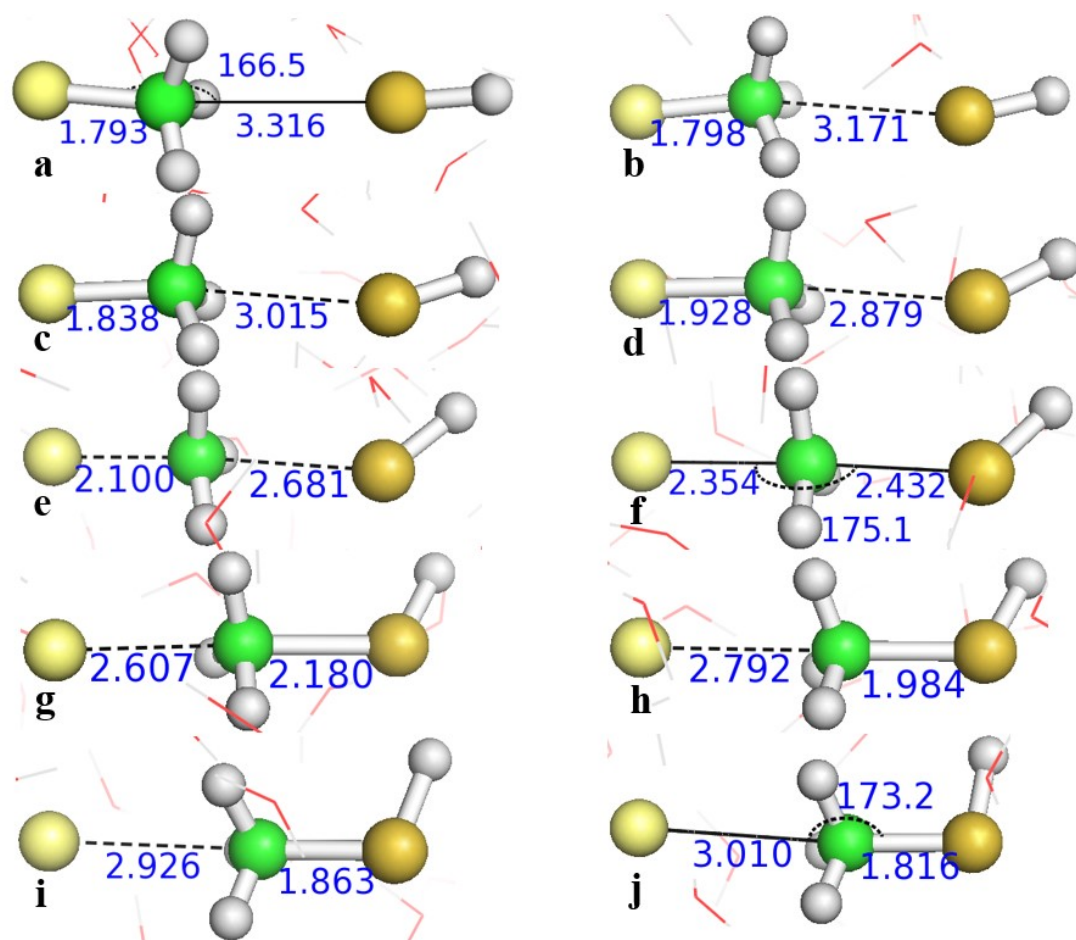

**Fig. S8** Structural evolution along the NEB reaction path for the  $\text{SH}^- + \text{CH}_3\text{Cl}$  reaction in water solution. No. a is the reactant complex, No. f is the transition state, and No. j is the product complex. The units of the distances and angles are angstroms and degrees, respectively.

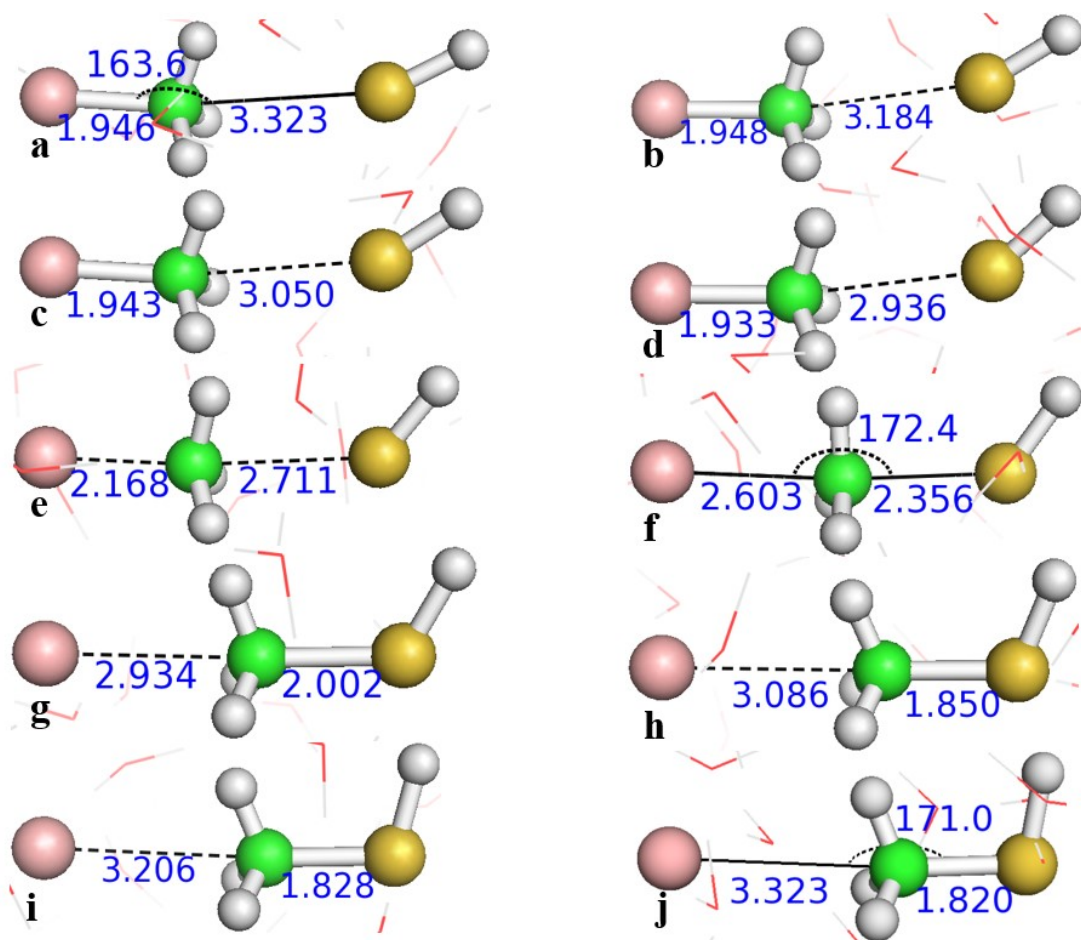

**Fig. S9** Structural evolution along the NEB reaction path for the  $\text{SH}^- + \text{CH}_3\text{Br}$  reaction in water solution. No. a is the reactant complex, No. f is the transition state, and No. j is the product complex. The units of the distances and angles are angstroms and degrees, respectively.

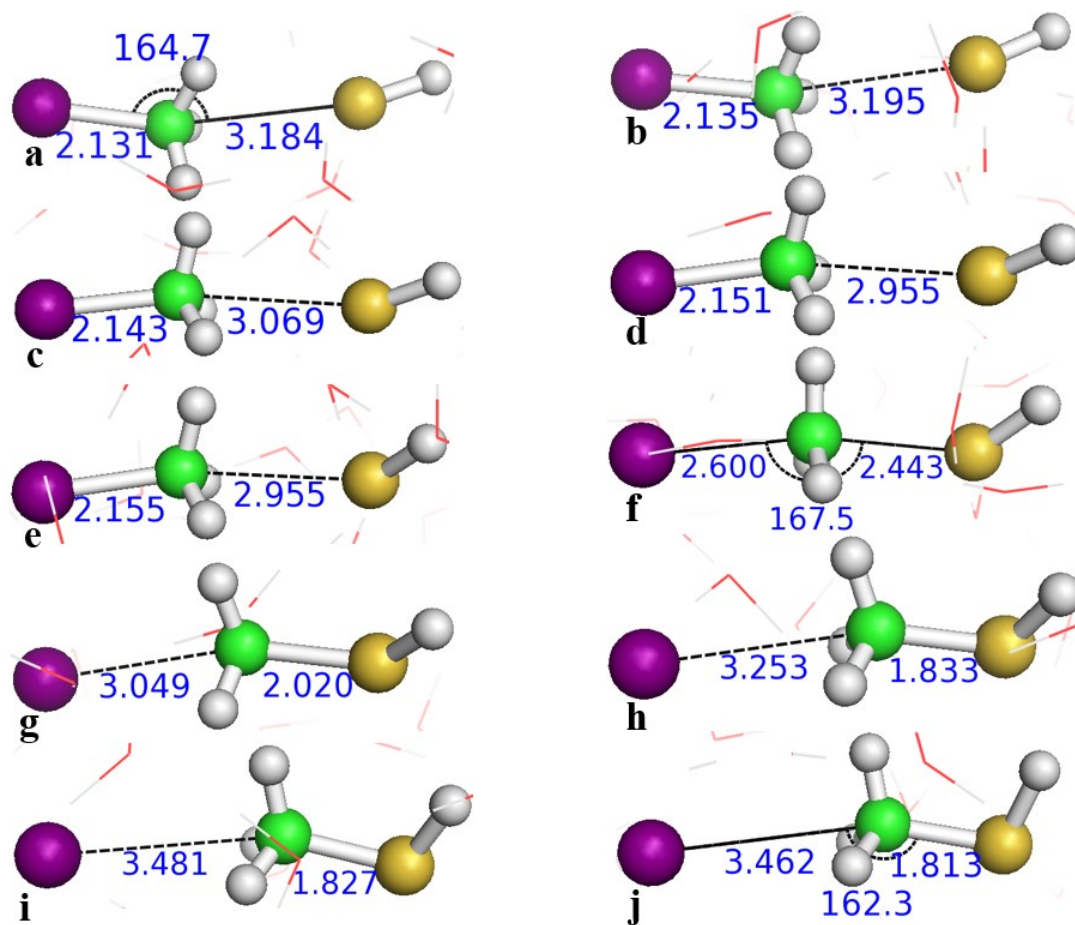

**Fig. S10** Structural evolution of the NEB reaction path for the  $\text{SH}^- + \text{CH}_3\text{I}$  reaction in water solution. No. a is the reactant complex, No. f is the transition state, and No. j is the product complex. The units of the distances and angles are angstroms and degrees, respectively.

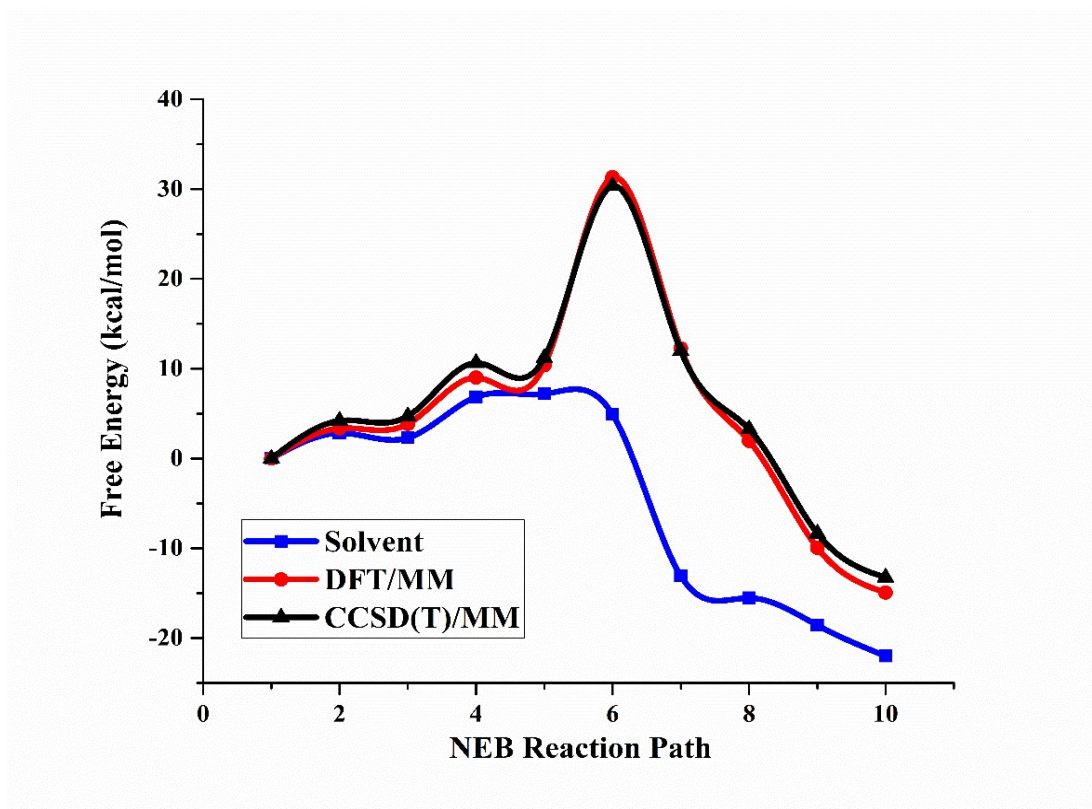

**Fig. S11** The potentials of mean force calculated at DFT/MM and CCSD(T)/MM levels of theory and solvent energy contribution with the reactant complex as the energy reference point for the  $\text{SH}^- + \text{CH}_3\text{F}$  reaction in water solution.

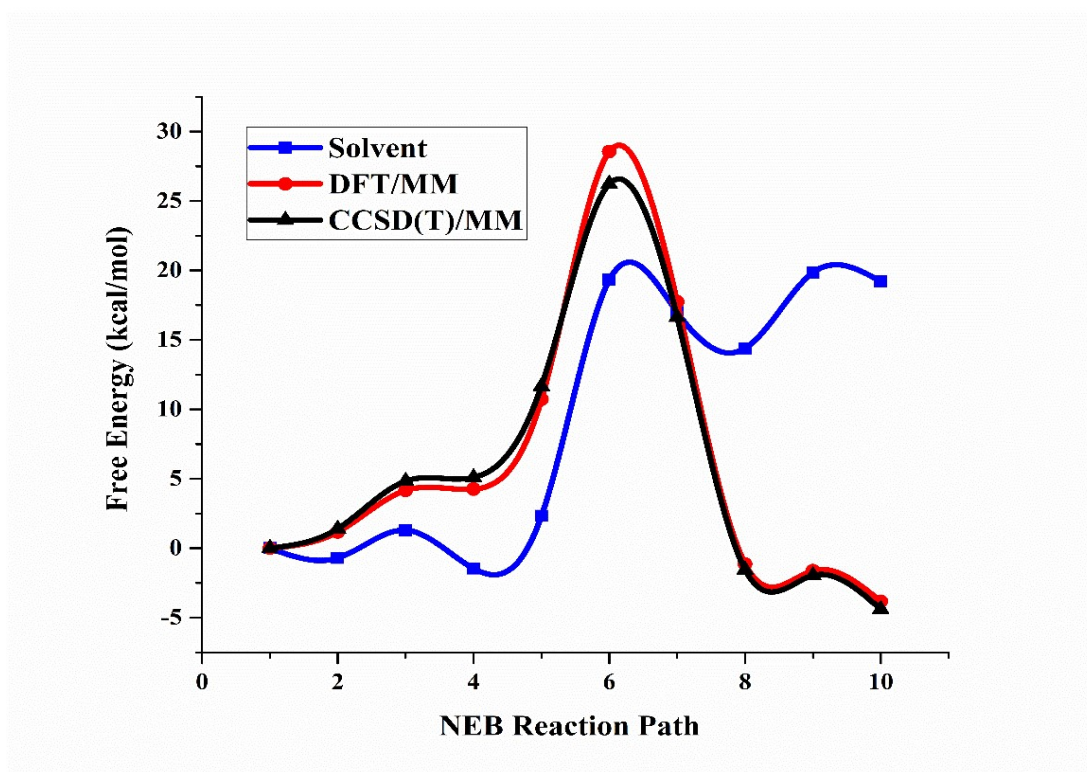

**Fig. S12** The potentials of mean force calculated at DFT/MM and CCSD(T)/MM levels of theory and solvent energy contribution with the reactant complex as the energy reference point for the  $\text{SH}^- + \text{CH}_3\text{Cl}$  reaction in water solution.



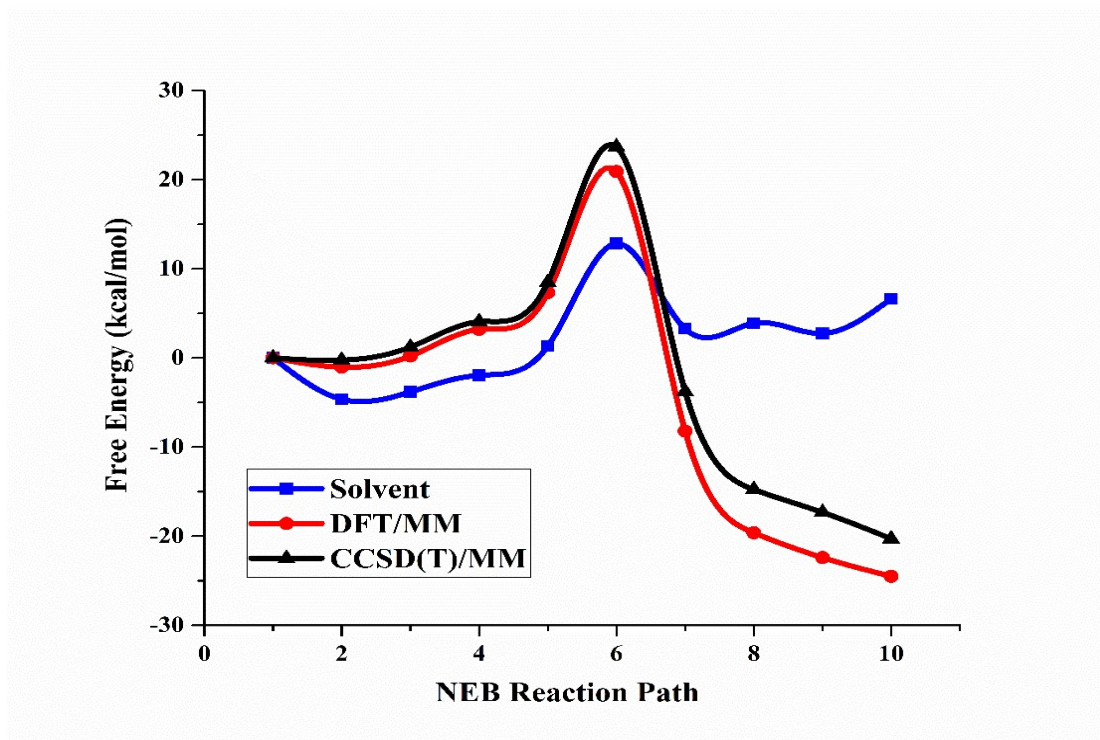

**Fig. S13** The potentials of mean force calculated at DFT/MM and CCSD(T)/MM levels of theory and solvent energy contribution with the reactant state as the energy reference point for the  $\text{SH}^- + \text{CH}_3\text{Br}$  reaction in water solution.

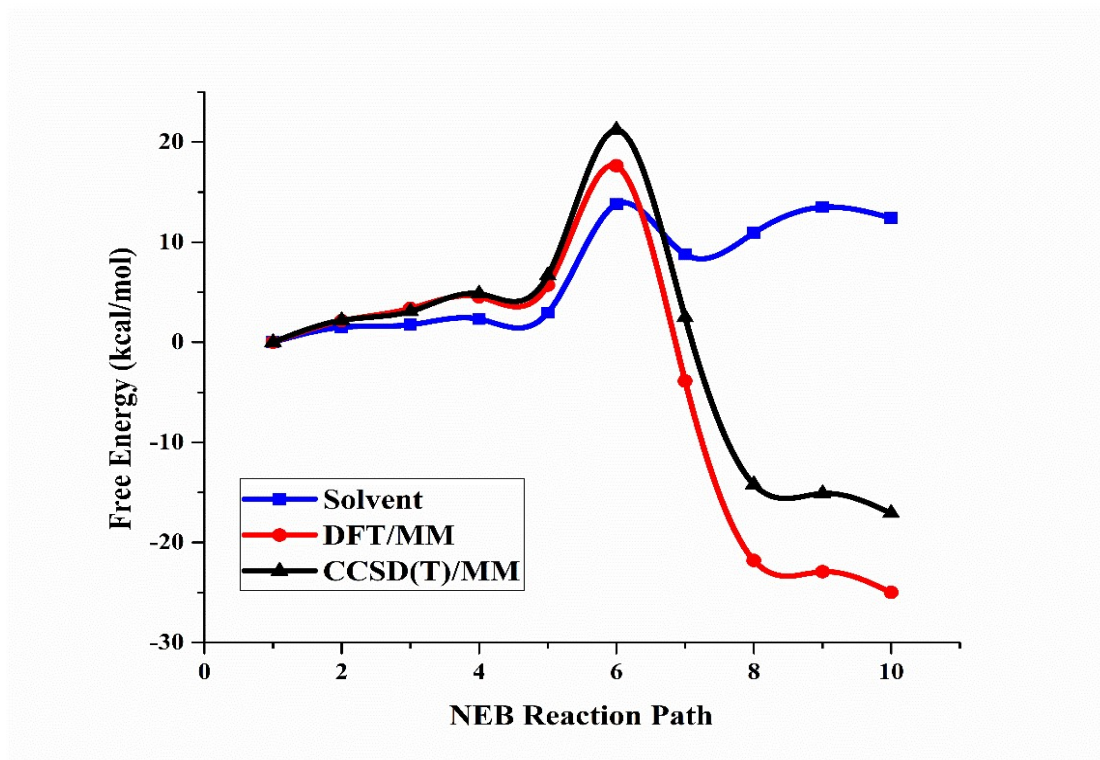

**Fig. S14** The potentials of mean force calculated at DFT/MM and CCSD(T)/MM levels of theory and solvent energy contribution with the reactant complex as the energy reference point for the  $\text{SH}^- + \text{CH}_3\text{I}$  reaction in water solution.
